# Supplementary material for: Drug dual-release matrix proprieties and the correlations with nanostructure aggregation kinetics for siloxane-polyether/hydrogel nanocomposites
Source: Royal Society of Chemistry journal article supplement (doi:10.1039/d0ra08270h), 2021-01-01
Supplement: d0ra08270h1.pdf [file d0ra08270h1.pdf]

## Electronic Supplementary Information (ESI)

### Drug dual-release matrix proprieties and the correlations with nanostructure aggregation kinetics for siloxane-polyether / hydrogel nanocomposites

Mac-Kedson Medeiros Salviano Santos,<sup>a,b,c</sup> Marcelo Henrique Sousa<sup>a,b</sup> and Juliano Alexandre Chaker<sup>a,b</sup>

<sup>a</sup> Institute of Biological Sciences, University of Brasilia, Brasilia, Brazil.

<sup>b</sup> Faculty of Ceilandia, University of Brasilia, Brasilia, Brazil.

<sup>c</sup> Centro Universitário Unieuro. Brasília, DF, Brazil

## RESULTS

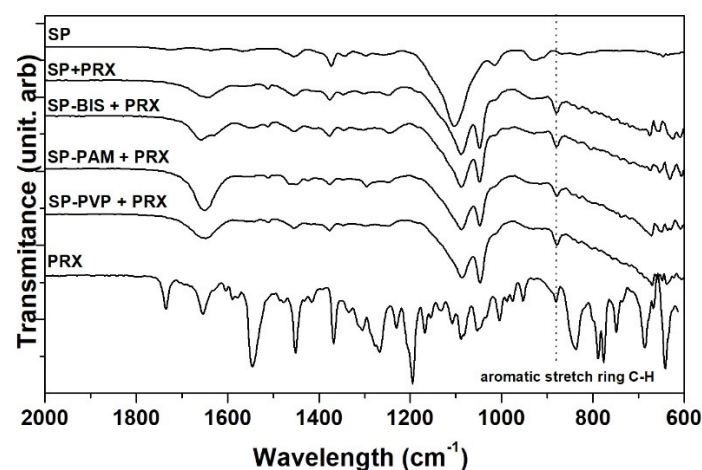

**Figure S1.** Comparative infrared spectrum of SP without piroxicam (PRX) and SP, SP-BIS, SP-PAM and SP-PVP with piroxicam samples.

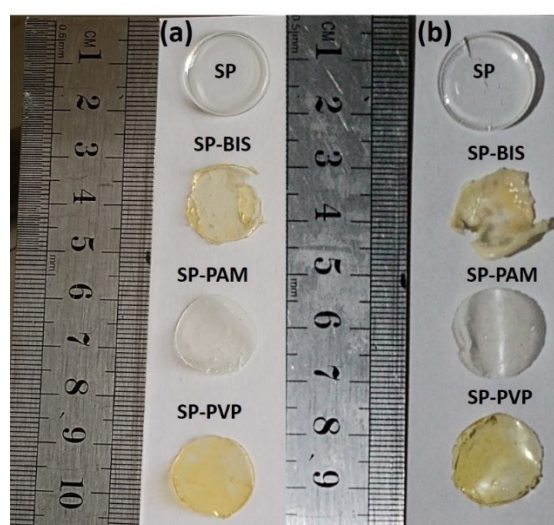

**Figure S2.** Photos of nanocomposites SP; SP-BIS, SP-PAM and SP-PVP (a) Dry and (b) after swelling process for 24 hours.
